# Supplementary material for: miR-210 Expression Is Strongly Hypoxia-Induced in Anaplastic Thyroid Cancer Cell Lines and Is Associated with Extracellular Vesicles and Argonaute-2
Source: MDPI journal article supplement (doi:10.3390/ijms24054507), 2023-02-24
Supplement: s1 [file s1]

Figure S1

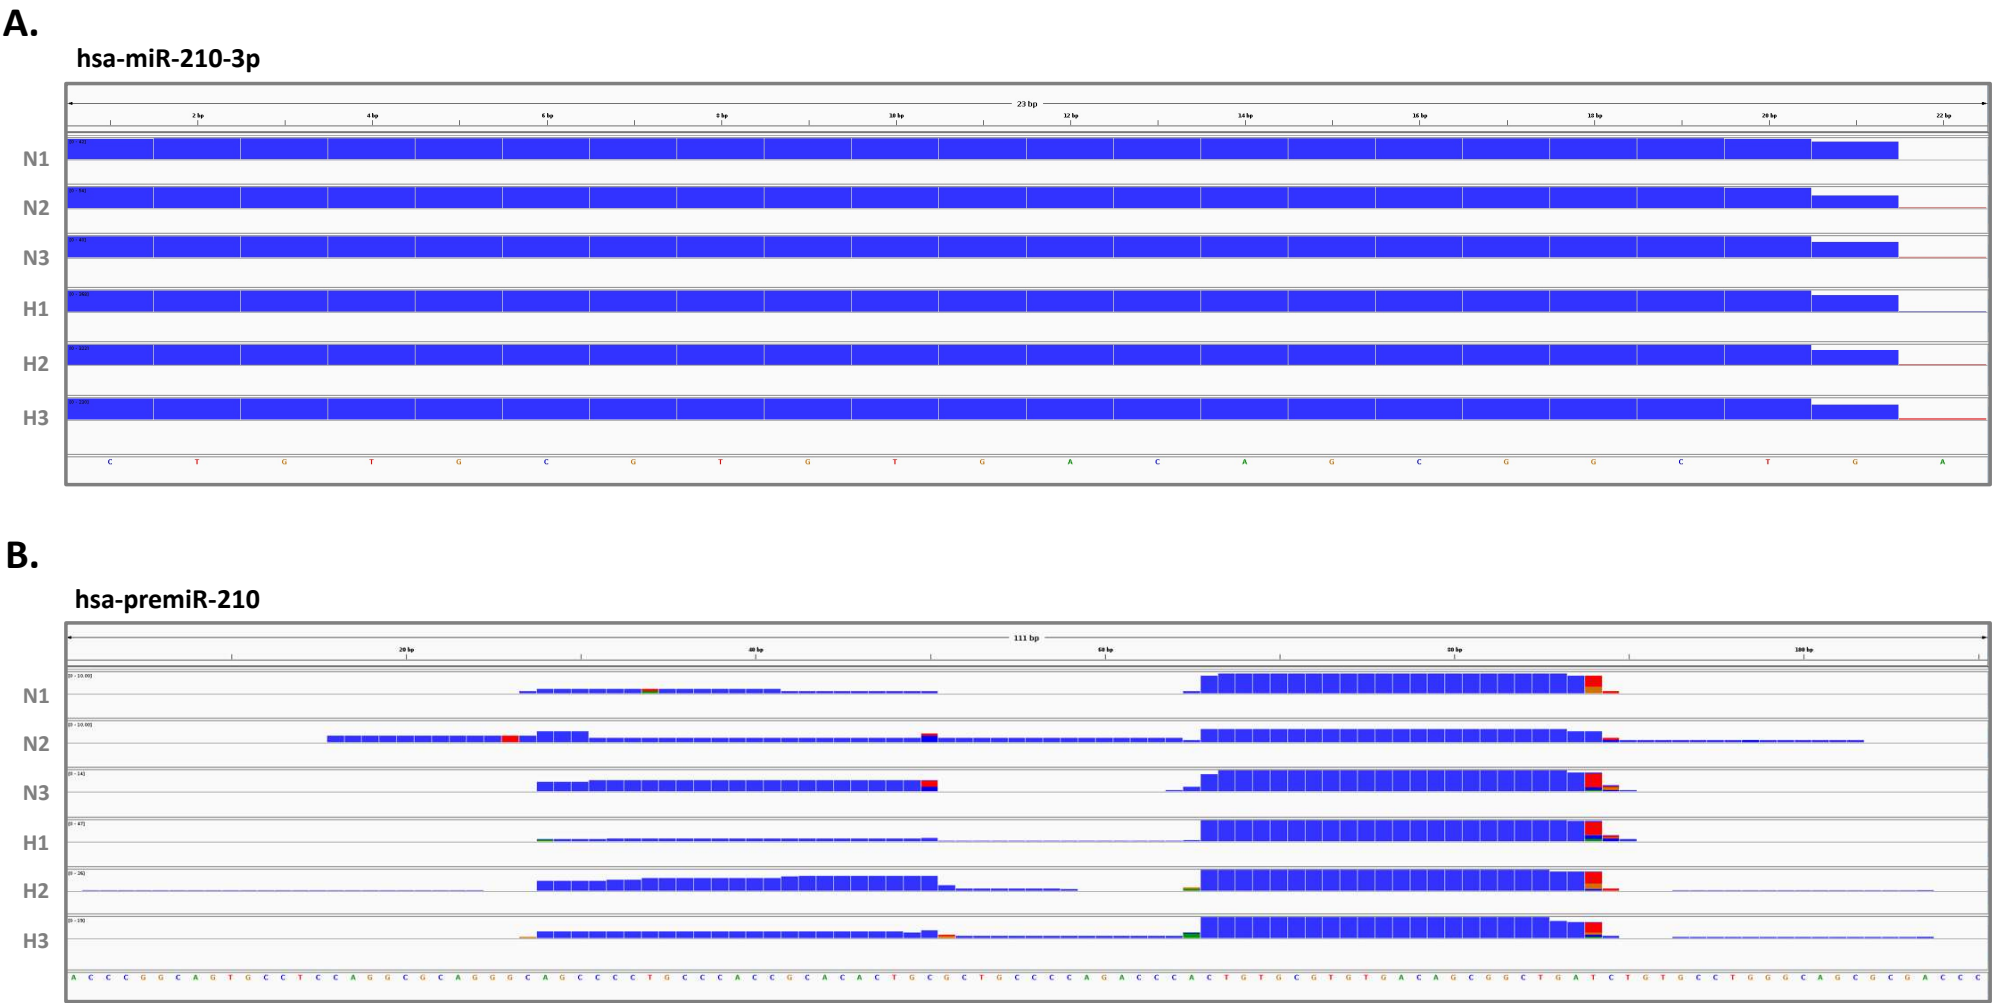

Figure S2

A.

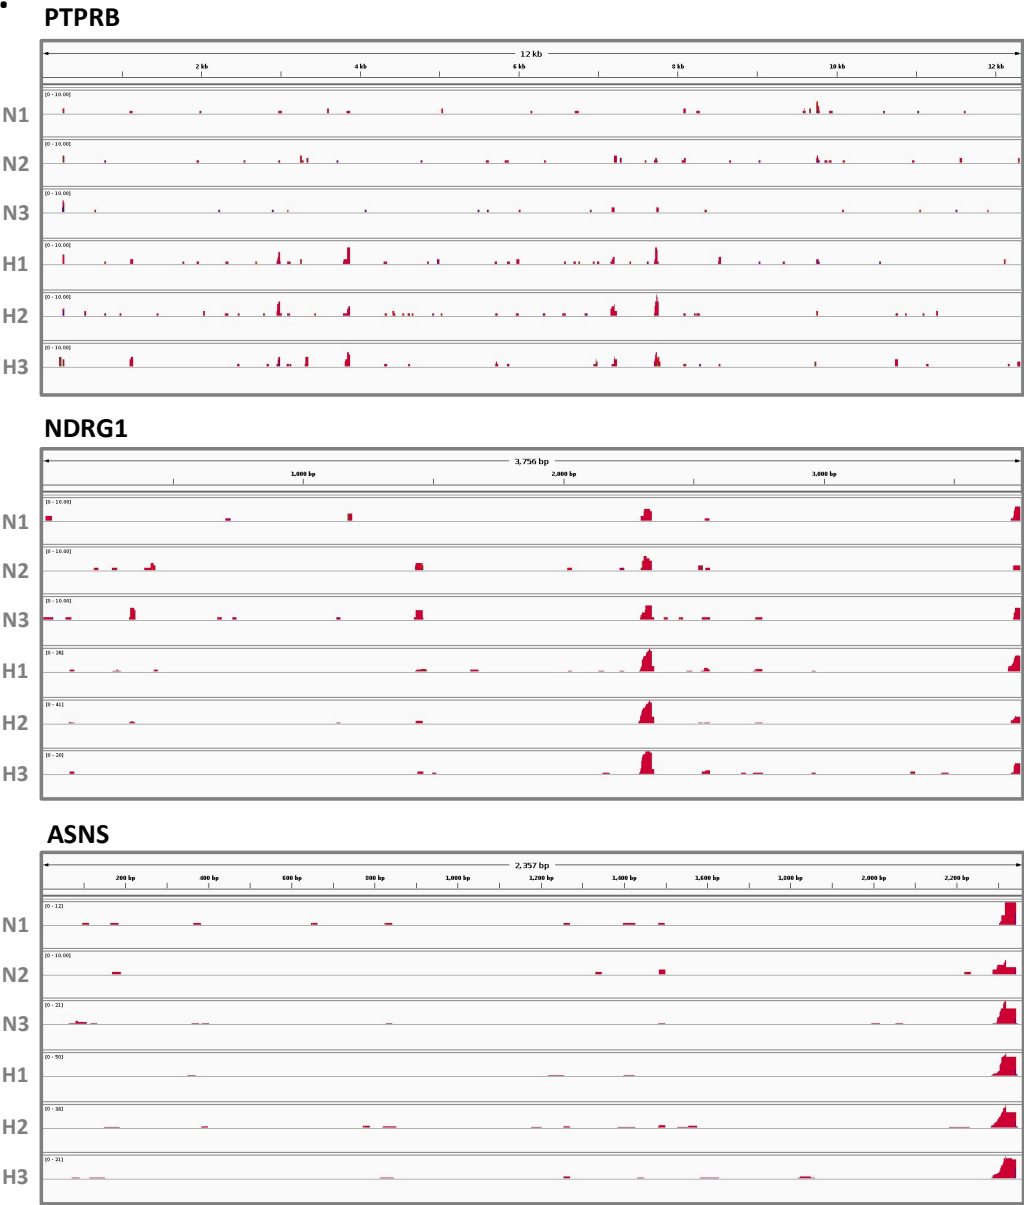

B.

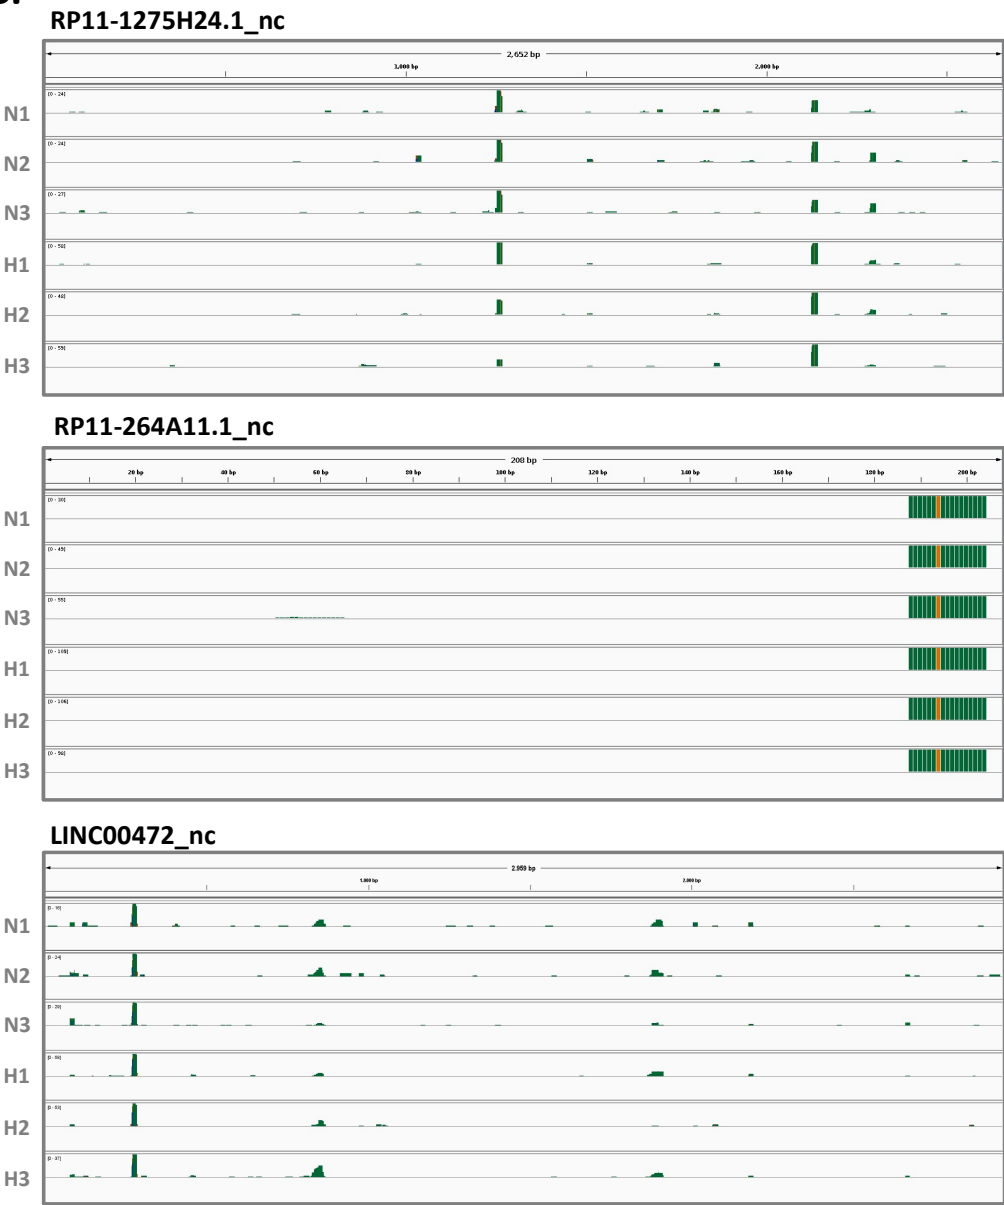

Figure S3

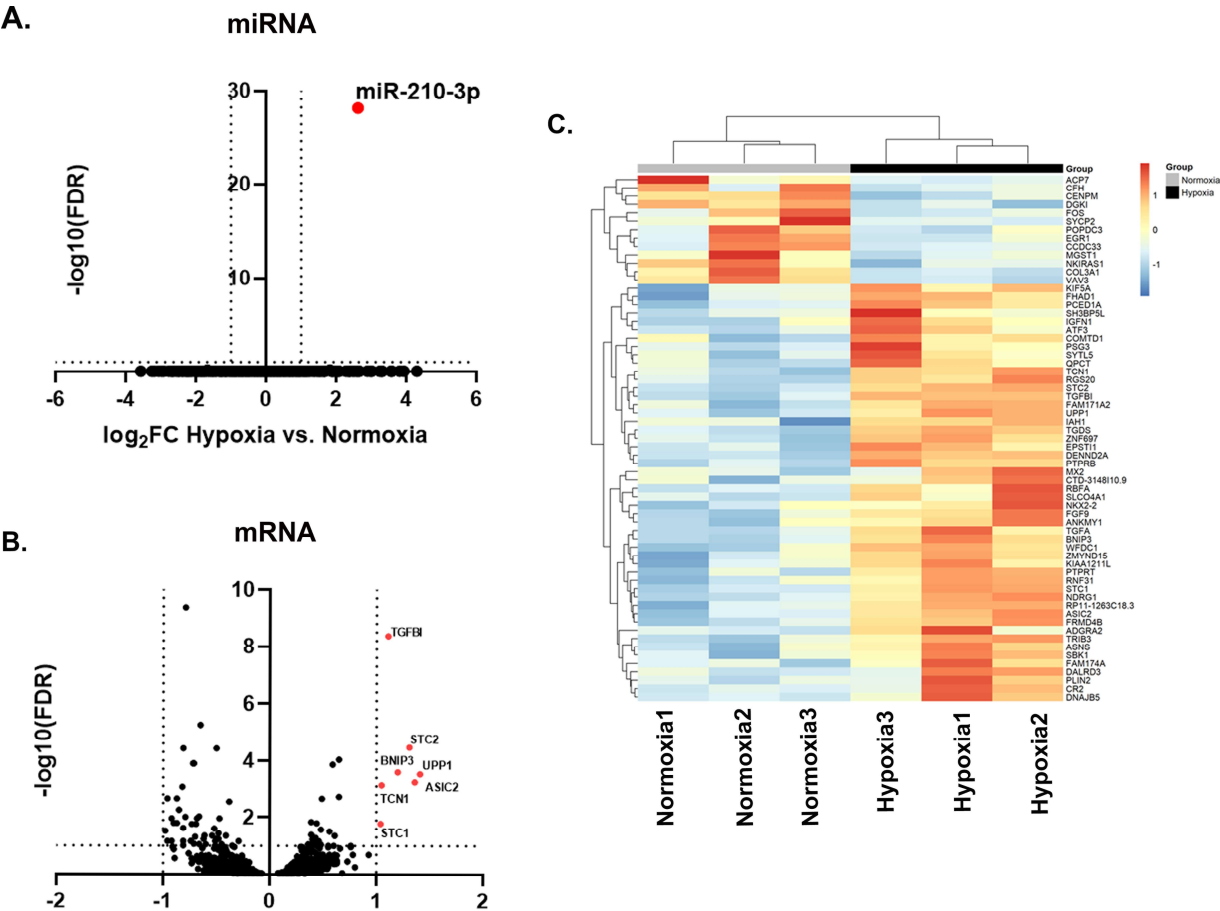

Table S1

| gene_symbol       | Average Expression | LFC         | P.value.adj  |
|-------------------|--------------------|-------------|--------------|
| hsa-miR-210-3p    |                    | 2.421453976 | 2.695186     |
| PTPRB             |                    | 0.2857804   | 1.738538066  |
| NDRG1             |                    | 0.532457677 | 1.702125264  |
| TRIB3             |                    | 0.384872744 | 1.55863324   |
| hsa-premir-210    |                    | 0.157953091 | 1.473553426  |
| UPP1              |                    | 1.263767299 | 1.436378529  |
| ASIC2             |                    | 1.290199582 | 1.400179586  |
| STC2              |                    | 1.682619784 | 1.319323167  |
| RP11-1275H24.1_nc |                    | 1.184162838 | 1.291471249  |
| BNIP3             |                    | 1.735724169 | 1.208848471  |
| RP11-264A11.1_nc  |                    | 1.640188667 | 1.195951589  |
| TGFB1             |                    | 3.248035496 | 1.130427928  |
| RP11-1263C18.3    |                    | 3.955616595 | 1.084339839  |
| TCN1              |                    | 2.104974419 | 1.081929627  |
| CAPS              |                    | 1.459159155 | 1.045164762  |
| STC1              |                    | 1.31775539  | 1.042375239  |
| VEGFA             |                    | 4.673942346 | 0.975427284  |
| AMIGO2            |                    | 1.33992046  | 0.972580479  |
| CDCP1             |                    | 2.046699132 | 0.960792459  |
| DDIT4             |                    | 1.932661487 | 0.946294002  |
| LINC00472_nc      |                    | 1.451304517 | 0.936879742  |
| SOCS2             |                    | 1.179392173 | 0.936728679  |
| RP11-161H23.9_nc  |                    | 3.114705504 | 0.924547841  |
| LAMB3             |                    | 1.715652011 | 0.898041581  |
| SYTL2             |                    | 2.054733423 | 0.877949598  |
| PCDHB3            |                    | 2.330256867 | 0.870918063  |
| LOXL2             |                    | 2.01126249  | 0.868641257  |
| LOX               |                    | 2.417221273 | 0.860667561  |
| P4HA1             |                    | 3.068209934 | 0.848657102  |
| KLF7              |                    | 1.832137892 | 0.844614805  |
| PSAT1             |                    | 2.30362157  | 0.844165441  |
| hsa-premir-3714   |                    | 2.303416484 | 0.842444476  |
| ARRDC3            |                    | 3.425439101 | 0.816265755  |
| SLC2A3            |                    | 1.466912986 | 0.8072138    |
| RND3              |                    | 5.229575354 | 0.794879607  |
| XAF1              |                    | 2.412635359 | 0.787185719  |
| SCG2              |                    | 4.347875345 | 0.776854807  |
| RP11-84G21.1_nc   |                    | 1.934323191 | 0.774624836  |
| RP11-356C4.5_nc   |                    | 3.419297509 | 0.749209743  |
| CAPG              |                    | 2.017068533 | 0.738004192  |
| LDHA              |                    | 4.99226325  | 0.736015742  |
| IRS2              |                    | 2.370240197 | 0.733404244  |
| MRPS26            |                    | 2.014542639 | 0.729088986  |
| PGK1              |                    | 3.969370246 | 0.711546794  |
| PFKP              |                    | 2.218783011 | 0.701313665  |
| BTG1              |                    | 2.749320795 | 0.695206577  |
| SAMD9             |                    | 2.950375463 | 0.664606382  |
| AP1S2             |                    | 3.225755429 | 0.658683789  |
| ITGB8             |                    | 4.929417604 | 0.651178503  |
| MTHFD2            |                    | 2.980101597 | 0.624825528  |
| NTM               |                    | 2.523009971 | 0.620963675  |
| AUP1              |                    | 2.471280436 | 0.59787804   |
| hsa-miR-193b-5p   |                    | 3.268620594 | 0.571398148  |
| MEF2A             |                    | 3.397657219 | 0.550961031  |
| TPI1              |                    | 3.792292128 | 0.515021035  |
| GUCY1A2           |                    | 3.483361034 | 0.509933119  |
| TIMP3             |                    | 5.682755248 | 0.506362874  |
| ALDOA             |                    | 3.523764225 | 0.488242748  |
| MXI1              |                    | 3.78649179  | 0.480034086  |
| TXNIP             |                    | 4.997340224 | 0.472049994  |
| VIM               |                    | 8.163455173 | 0.389934288  |
| IGFBP4            |                    | 4.275930682 | -0.473504232 |
| SFPQ              |                    | 5.207540845 | -0.488228561 |
| MKI67             |                    | 7.005813655 | -0.589263553 |
| EPAS1             |                    | 4.112701136 | -0.63471226  |
| CYP11B1           |                    | 5.022152007 | -0.641963104 |
